# Supplementary material
Source: publisher figshare collection journal article supplement (https://karger.figshare.com/articles/dataset/_/24146715)
Supplement: Supplementary file 1 [file 1]

**Supplementary table 2:** Mayo-Clinic Risk score of Muir-Torre Syndrome of patients, sebaceous neoplasm with their mismatch repair.

| **Patient** | **MMR status in SN** | **Points for Age at first SN (age)** | **Point for number of SN (number)** | **Points for personal LS-related neoplasm (type)** | **Points for LS related tumor in family (type and person)** | **Mayo Clinic Risk Score** | **MTS-LS (y/n)** |
| --- | --- | --- | --- | --- | --- | --- | --- |
| 1 | Deficient | 0 | 2 (2) | 1 (CCR) | 0 | 3 | Yes (NA) |
| 2 | Deficient | 0 | 2 (2) | 0 | 0 | 2 | No |
| 3 | Proficient | 0 | 0 (1) | 0 | 1 (CCR mother and OC sister) | 1 | No |
| 4 | Deficient | 0 | 2 (2) | 0 | 0 | 2 | No |
| 5 | Deficient | 0 | 0 (1) | 0 | 0 | 0 | No |
| 6 | Deficient | 0 | 2 (2) | 0 | 0 | 2 | No |
| 7 | Deficient | 0 | 0 (1) | 0 | 0 | 0 | No |
| 8 | Deficient | 0 | 0 (1) | 0 | 0 | 0 | No |
| 9 | Deficient | 0 | 0 (1) | 0 | 0 | 0 | No |
| 10 | Deficient | 0 | 2 (3) | 1 (CCR) | 0 | 3 | Yes (MSH2) |
| 11 | Deficient | 0 | 2 (10) | 0 | 1 (CCR father) | 3 | No |
| 12 | Deficient | 0 | 0 (1) | 0 | 0 | 0 | No |
| 13 | Deficient | 0 | 0 (1) | 0 | 0 | 0 | No |
| 14 | Deficient | 1 | 2 (5) | 1 (UC) | 1 (NA) | 5 | Yes (MSH2) |
| 15 | Deficient | 0 | 0 (1) | 0 | 0 | 0 | No |
| 16 | Deficient | 0 | 2 (2) | 1 (CCR, UC, vaterian ampuloma) | 0 | 3 | Yes (MSH2) |
| 17 | Deficient | 0 | 0 (1) | 0 | 0 | 0 | No |
| 18 | Deficient | 0 | 2 (10) | 1 (DC, UC) | 0 | 3 | Yes (NA) |
| 19 | Deficient | 0 | 0 (1) | 1 (EC) | 0 | 1 | No |
| 20 | Proficient | 0 | 0 (1) | 0 | 0 | 0 | No |
| 21 | Deficient | 1 | 2 (2) | 1 (EC) | 1 (DC father, PC aunt, EC aunt, BT cousin, UC cousin) | 5 | Yes (MSH2) |
| 22 | Deficient | 0 | 0 (1) | 0 | 0 | 0 | No |
| 23 | Deficient | 0 | 0 (1) | 0 | 0 | 0 | No |
| 24 | Deficient | 0 | 0 (1) | 0 | 0 | 0 | No |
| 25 | Proficient | 0 | 0 (1) | 0 | 0 | 0 | No |
| 26 | Deficient | 0 | 0 (1) | 0 | 0 | 0 | No |
| 27 | Deficient | 0 | 0 (1) | 0 | 0 | 0 | No |
| 28 | Deficient | 1 | 2 (5) | 1 (CCR) | 0 | 4 | Yes (MLH1) |
| 29 | Deficient | 1 | 2 (2) | 1 (EC, CCR) | 1 (CCR father, CCR grand father) | 5 | Yes (MSH2) |
| 30 | Deficient | 0 | 0 (1) | 0 | 0 | 0 | No |
| 31 | Proficient | 0 | 2 (2) | 0 | 0 | 2 | No |
| 32 | Deficient | 0 | 0 (1) | 0 | 0 | 0 | No |
| 33 | Proficient | 0 | 0 (1) | 0 | 0 | 0 | No |
| 34 | Proficient | 0 | 0 (1) | 0 | 0 | 0 | No |
| 35 | Deficient | 0 | 0 (1) | 1 (CCR, EC) | 0 | 1 | No |
| 36 | Deficient | 1 | 2 (3) | 1 (CCR) | 0 | 4 | NA |
| 37 | Deficient | 0 | 0 (1) | 0 | 0 | 0 | No |
| 38 | Deficient | 0 | 0 (1) | 0 | 0 | 0 | No |
| 39 | Deficient | 0 | 0 (1) | 0 | 0 | 0 | No |
| 40 | Deficient | 0 | 0 (1) | 0 | 0 | 0 | No |
| 41 | Deficient | 0 | 0 (1) | 0 | 0 | 0 | No |
| 42 | Deficient | 0 | 2 (5) | 0 | 0 | 2 | No |
| 43 | Deficient | 0 | 0 (1) | 0 | 0 | 0 | No |
| 44 | Proficient | 0 | 0 (1) | 0 | 0 | 0 | No |
| 45 | Proficient | 0 | 0 (1) | 0 | 0 | 0 | No |
| 46 | Deficient | 0 | 0 (1) | 0 | 0 | 0 | No |
| 47 | Deficient | 0 | 2 (6) | 0 | 0 | 2 | No |
| 48 | Deficient | 0 | 0 (1) | 0 | 0 | 0 | No |
| 49 | Deficient | 0 | 0 (1) | 0 | 0 | 0 | No |
| 50 | Deficient | 0 | 0 (1) | 1 (CCR, EC, OC) | 1 (CCR one parent) | 2 | Yes (MSH6) |
| 51 | Proficient | 0 | 0 (1) | 0 | 0 | 0 | No |
| 52 | Deficient | 1 | 0 (1) | 0 | 0 | 1 | No |
| 53 | Proficient | 0 | 0 (1) | 0 | 0 | 0 | No |
| 54 | Deficient | 0 | 0 (1) | 1 (CCR, EC, UC) | 1 (OC sister) | 2 | Yes (MLH1) |
| 55 | Proficient | 0 | 0 (1) | 0 | 0 | 0 | No |
| 56 | Proficient | 0 | 0 (1) | 0 | 0 | 0 | No |
| 57 | Proficient | 1 | 0 (1) | 0 | 0 | 1 | No |
| 58 | Deficient | 0 | 0 (1) | 0 | 0 | 0 | No |
| 59 | Deficient | 0 | 0 (1) | 0 | 1 (CCR brother, OC & EC sister, CCR father, CCR grand father, CCR grand mother, CCR aunt, CCR cousin, EC aunt) | 1 | Yes (MSH2) |
| 60 | Proficient | 0 | 0 (1) | 0 | 0 | 0 | No |
| 61 | Proficient | 0 | 0 (1) | 0 | 0 | 0 | No |
| 62 | Deficient | 0 | 0 (1) | 0 | 0 | 0 | No |
| 63 | Deficient | 0 | 0 (1) | 0 | 0 | 0 | No |
| 64 | Proficient | 0 | 0 (1) | 0 | 0 | 0 | No |
| 65 | Proficient | 0 | 0 (1) | 0 | 0 | 0 | No |
| 66 | Proficient | 0 | 0 (1) | 1 (UC) | 0 | 1 | No |
| 67 | Deficient | 0 | 0 (1) | 0 | 0 | 0 | No |
| 68 | Proficient | 0 | 0 (1) | 0 | 1 (CCR mother) | 1 | No |
| 69 | Deficient | 0 | 0 (1) | 0 | 0 | 0 | No |
| 70 | Proficient | 0 | 0 (1) | 0 | 0 | 0 | No |
| 71 | Deficient | 0 | 0 (1) | 0 | 0 | 0 | No |
| 72 | Proficient | 0 | 0 (1) | 0 | 0 | 0 | No |
| 73 | Proficient | 0 | 0 (1) | 0 | 0 | 0 | No |
| 74 | Proficient | 0 | 0 (1) | 0 | 1 (CCR in familly) | 1 | No |
| 75 | Proficient | 0 | 0 (1) | 0 | 0 | 0 | No |
| 76 | Proficient | 1 | 0 (1) | 0 | 0 | 1 | No |
| 77 | Deficient | 0 | 0 (1) | 0 | 0 | 0 | No |
| 78 | Deficient | 0 | 0 (1) | 0 | 0 | 0 | No |
| 79 | Proficient | 0 | 0 (1) | 0 | 0 | 0 | No |
| 80 | Deficient | 0 | 0 (1) | 0 | 0 | 0 | No |
| 81 | Deficient | 0 | 0 (1) | 0 | 0 | 0 | No |
| 82 | Proficient | 0 | 0 (1) | 0 | 0 | 0 | No |
| 83 | Deficient | 0 | 0 (1) | 1 (CCR) | 0 | 1 | No |
| 84 | Deficient | 0 | 0 (1) | 1 (CCR) | 0 | 1 | No |
| 85 | Deficient | 0 | 0 (1) | 0 | 0 | 0 | No |
| 86 | Deficient | 0 | 0 (1) | 0 | 0 | 0 | No |
| 87 | Deficient | 0 | 0 (1) | 1 (CCR) | 0 | 1 | No |
| 88 | Deficient | 0 | 0 (1) | 0 | 0 | 0 | No |
| 89 | Deficient | 0 | 0 (1) | 0 | 0 | 0 | No |
| 90 | Deficient | 0 | 0 (1) | 1 (UC) | 1 (CCR & UC father, CCR grand father, UC brother, UC daughter, UC daughter) | 2 | Yes (MSH2) |
| 91 | Deficient | 0 | 2(8) | 1 (CCR) | 1 (UC mother) | 4 | Yes (MLH1) |
| 92 | Deficient | 0 | 0 (1) | 0 | 0 | 0 | No |
| 93 | Deficient | 0 | 0 (1) | 0 | 0 | 0 | No |
| 94 | Deficient | 0 | 0 (1) | 0 | 0 | 0 | No |

Legends: SN = sebaceous neoplasm, MMR = mismatch repair, CCR = colorectal carcinoma, EC = endometrial carcinoma, UC = urothelial carcinoma, DC duodenal carcinoma, OC = ovary carcinoma, PC = pancreatic carcinoma (exocrine), BT = brain tumor, NA = Not available.
